# Supplementary material for: Barriers and Facilitators to Adopting Safe Burial Practices During an Ebola Virus Disease Outbreak in Liberia: A Mixed Methods Study
Source: Research Square preprint supplement (doi:10.21203/rs.3.rs-7770898/v1), 2025-11-10
Supplement: Supplementary file 1 [file a439a49488e2262c6fecdf65.pdf]

## Interview questionnaire

### Section 1: Socio-demographic characteristics

1. What is your gender?

1 Male          2 Female

2. How old are you?

\_\_\_\_\_years

3. What is your tribe?

1 Mandingo tribe          2 Kpelle tribe

4. What is your current place of residence?

1 Vai Town          2 Clara Town

5. What is your religion?

1 Christian          2 Muslim          3 no religion

99 Other (specify).....

6. What is your marital status?

1 Single          2 Married          3 Widowed          4 Separated/Divorce

7. What is your highest level of education completed?

1 Did not go to school          2 Elementary School          3 High school

4 bachelor's degree or higher

8. What is your principal occupation? (Choose one main occupation to answer)

☐ 1. Unemployed (retired, housewife)

☐ 2. Business owner (with employee (s) )

☐ 3. Business Owner (with no employee (s) )

☐ 4. Laborer/Employed for wages

☐ 5. Private company employee

☐ 6. Government staff (civil servant, permanent employee, temporary worker)

☐ 7. Work in a family business without pay

☐ 8. Cooperative/ Network Marketing

☐ 9. Farmer/Agriculture

☐ 99. Other, (Specify)-----

**Section 2: General knowledge about Ebola virus disease**

| Question                                                                                            | Yes<br>(1) | No<br>(0) |
|-----------------------------------------------------------------------------------------------------|------------|-----------|
| 9. Do you believe a virus causes Ebola? (yes)                                                       |            |           |
| 10. Can Ebola virus disease symptoms include severe bleeding? (yes)                                 |            |           |
| 11. Is there a cure for Ebola virus disease? (NO)                                                   |            |           |
| 12. Is consuming undercooked meat from infected animals a risk factor for Ebola virus disease? (NO) |            |           |
| 13. Are children more resistant to Ebola virus disease than adults? (NO)                            |            |           |
| 14. Can Ebola virus disease survivors become immune to the virus? (YES)                             |            |           |
| 15. Is the Ebola virus disease always fatal? (No)                                                   |            |           |
| 16. Can animals, such as bats, transmit Ebola virus disease to humans? (yes)                        |            |           |
| 17. Does the Ebola virus disease only affect people in African countries? (No)                      |            |           |
| 18. Can good hygiene practices reduce the risk of Ebola virus disease transmission? (yes)           |            |           |

**Section 3: Knowledge about transmission routes of Ebola virus disease**

| Question                                                                                                        | Yes<br>(1) | No<br>(0) |
|-----------------------------------------------------------------------------------------------------------------|------------|-----------|
| 19. Can Ebola virus disease be transmitted through direct contact with the bodily fluids of an infected person? |            |           |
| 20. Is it possible to contract Ebola virus disease by touching surfaces contaminated with the virus?            |            |           |
| 21. Can Ebola virus disease spread through the air over long distances?                                         |            |           |
| 22. Can Ebola virus disease be prevented through vaccination?                                                   |            |           |
| 23. Can mosquitoes transmit Ebola virus disease?                                                                |            |           |
| 24. Is the sexual transmission of Ebola virus disease possible?                                                 |            |           |
| 25. Can Ebola virus disease be spread through casual contact, such as shaking hands?                            |            |           |
| 26. Can a person transmit the Ebola virus disease before they start showing symptoms?                           |            |           |
| 27. Is it safe to consume fruit partially eaten by bats in Ebola virus disease-affected areas?                  |            |           |
| 28. Can the Ebola virus disease survive on surfaces outside the body for several days?                          |            |           |

#### Section 4: Attitudes toward controlling EVD in communities during funeral activities

| Question                                                                                                                   | Totally not agree (1) | Not agree (2) | Some what agree (3) | Agree (4) | Totally agree (5) |
|----------------------------------------------------------------------------------------------------------------------------|-----------------------|---------------|---------------------|-----------|-------------------|
| 29. Traditional funeral practices can be modified to prevent Ebola virus disease transmission.                             |                       |               |                     |           |                   |
| 30. You are confident in your ability to protect yourself from Ebola virus disease at a funeral.                           |                       |               |                     |           |                   |
| 31. You would report a funeral that did not follow safe burial practices for Ebola virus disease victims to the officials. |                       |               |                     |           |                   |
| 32. You trust health authorities to provide accurate information about the risks of Ebola virus disease at funerals        |                       |               |                     |           |                   |
| 33. Despite the potential risks, You feel driven to attend a funeral for an Ebola virus victim.                            |                       |               |                     |           |                   |
| 34. More education is needed on the risks of Ebola virus disease transmission at funerals.                                 |                       |               |                     |           |                   |

#### Section 5: Perceived risk of getting EVD during funerals (Agree (higher score) means high perceived risk)

| Question                                                                                 | Totally not agree (1) | Not agree (2) | Some what agree (3) | Agree (4) | Totally agree (5) |
|------------------------------------------------------------------------------------------|-----------------------|---------------|---------------------|-----------|-------------------|
| 35. Attending funerals of Ebola virus disease victims poses a high risk of transmission. |                       |               |                     |           |                   |
| 36. The risk of Ebola virus disease transmission at funerals is often underestimated.    |                       |               |                     |           |                   |
| 37. Your community is well-informed about the risks of Ebola virus disease at funerals.  |                       |               |                     |           |                   |
